# Supplementary material
Source: Springer Nature journal article supplement (https://www.springermedizin.de/resource/supplementary/13023_2009_172_MOESM3_ESM.pdf/9641870)

# Hypokalemic or resistant HTN

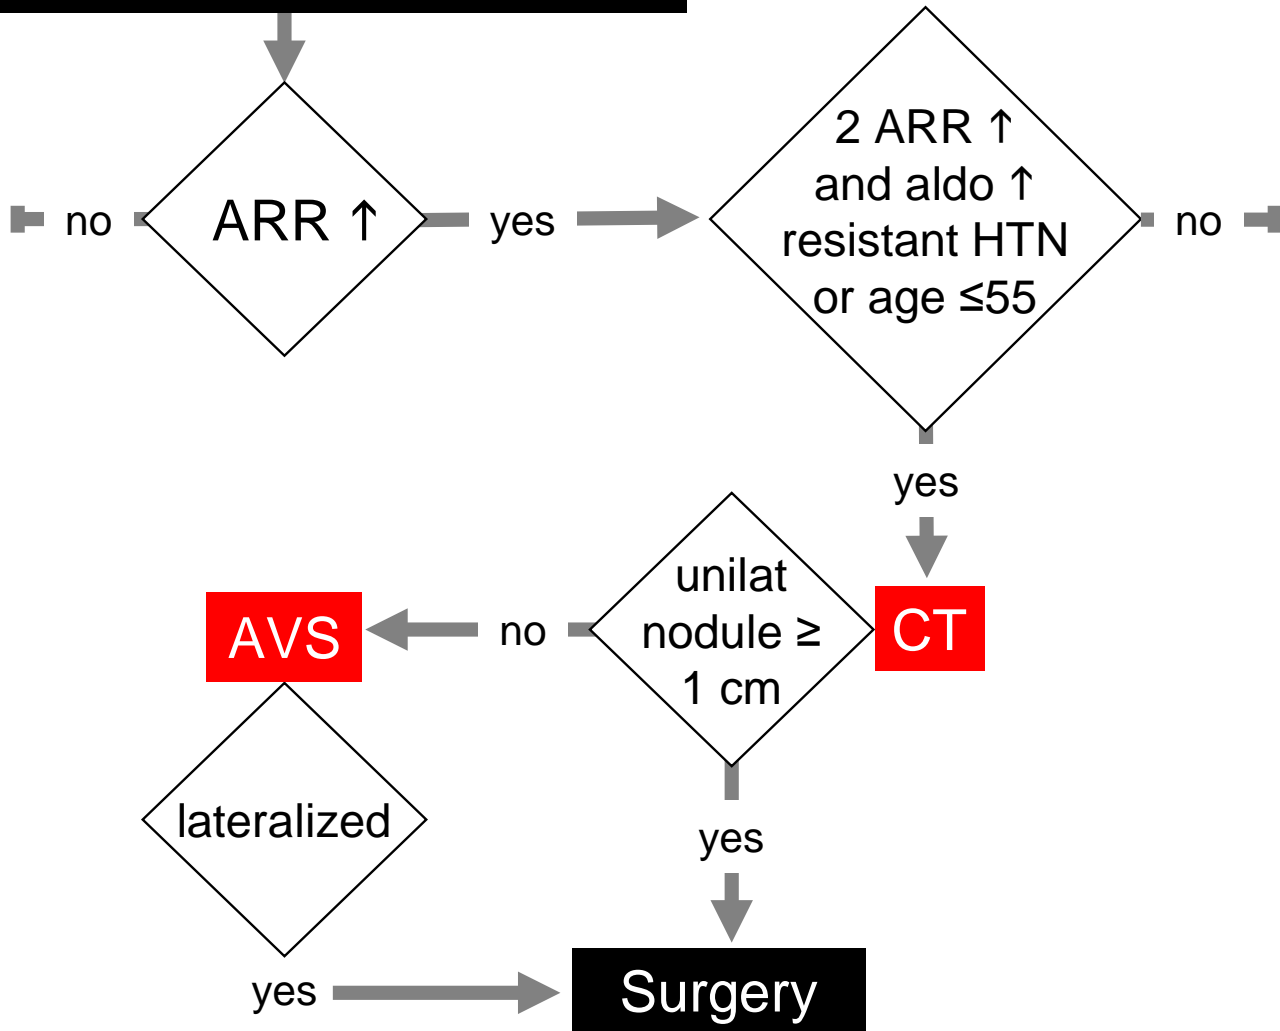

Supplement: MOESM3 [file 9641870]
